# Supplementary material
Source: PubMed Central journal article supplement (PMC3053998)
Supplement: 1014406108_pnas.201014406SI.pdf [file 1014406108_pnas.201014406SI.pdf]

# Supporting Information

Tatchell et al. 10.1073/pnas.1014406108

## SI Materials and Methods

**Yeast Strains, Media, and General Methods.** The yeast strains used in this work are listed in Table S1 and are congenic to strain JC482 (1). Yeast strains were grown on medium containing 1% yeast extract, 2% peptone, and 2% glucose (YPD) or synthetic complete (SC) medium unless stated otherwise. Strains were sporulated at 24 °C on medium containing 2% Bacto peptone, 1% yeast extract, and 2% potassium acetate. SC medium and media lacking specific amino acids were made as described by Sherman et al. (2). Yeast transformation, manipulation of *Escherichia coli*, and the preparation of bacterial growth media were performed as described previously (3, 4).

For mutagenesis, strain KT1963 (*MAT $\alpha$  leu2 ura3 his3 ipl1-2*) was diluted 1/100 from an overnight culture into H<sub>2</sub>O, and 250- $\mu$ l samples of this dilution were plated on YPD plates. Uncovered plates were irradiated with 50 units of UV light in a UVP-CL1000 UV crosslinker and then incubated for 24 h in the dark at 24 °C before transferring to 33 °C for 3 d. Recovered colonies were mated to KT1829 (*MAT $\alpha$  leu2 his3 ipl1-2*) and diploids were tested for dominance of the reversion event. Recessive suppressors were subjected to tetrad analysis. Recessive revertants fell into two classes. In a majority of the cases, two of four spore clones from each tetrad grew at 33 °C, indicating that the reversion event segregated as a single Mendelian mutation. In a few cases, only one in four spore clones was able to grow at 33 °C, suggesting that more than one mutation was responsible for suppression of *ipl1-2*. In most cases, this class of revertant was not studied further. However, in one case, revertant 71, half of the spore clones in each tetrad were cold sensitive (cs), failing to grow at 14 °C. All cs clones grew at 30 °C but only half were able to grow at 33 °C. These results indicate that two mutations in revertant 71 were necessary for growth at 33 °C and that one of these had an accompanying cs phenotype. Sequence analysis of the *TCO89* ORF from revertant 71 revealed 11 mutations (T5G, A12T, A53G, A93C, G94A, T95A, T1934A, A2293T, T2296A, T2297C, and C2299A).

To assay for chromosome III loss in diploids, *ipl1-2* homozygous and heterozygous strains were grown to log phase at 24 °C in YPD before shifting to 30 °C. At 2-h intervals, aliquots of the cultures were serially diluted and plated on YPD plates to determine cell viability. Another aliquot was mixed with a 10-fold excess of a culture of *MAT $\alpha$*  yeast strain KT82 (*MAT $\alpha$  hom3*), collected onto a nitrocellulose filter, and incubated on YPD medium at 24 °C. After 12 h, cells were transferred from the filters to H<sub>2</sub>O and plated on synthetic medium to select for growth of the mated cells.

The *tcO89::kanMX* and *tor1::kanMX* deletion strains from the deletion collection (5) obtained from Open Biosystems were amplified by PCR using flanking primers (5' CCATCTAG-ACTATCAATGATGGACGAC and 5' CTTGAGCTCTAG-TGATTCTGACCGATAG for *tcO89* and 5' CATTACTAACT-GCTGAGG and 5' CGTTTTGGTGATGAAGATG for *tor1*) and iProof high-fidelity DNA polymerase (Bio-Rad), according to the manufacturer's instructions. The amplified cassettes were used to transform the KT1112  $\times$  KT1113 wild-type diploid strain, drug-resistant prototrophic transformants were sporulated, and haploid meiotic segregants were isolated by tetrad analysis. All deletions, truncations, and integrations were confirmed by genomic PCR using primers in flanking sequences.

**Immunoblot Analysis.** To assess tagged protein levels, total protein was prepared from cultures by lysis in trichloroacetic acid (6, 7),

and equal volumes were applied to 4–20% gradient gels (Bio-Rad). Gels were blotted to nitrocellulose (Bio-Rad), and immunoblot analysis was performed as described (7) using anti-Myc 9E10 ascites antibody or BD Living Colors A.v. monoclonal anti-GFP (JL-8) antibody with HRP-conjugated secondary antibody and subsequent detection using ECL reagents (Pierce). Protein levels were quantitated from immunoblots using the Chemidoc system with Quantity One software V 4.6.6 (Bio-Rad), with phosphoglycerate kinase (P<sub>gk1</sub>) as a loading control (anti-P<sub>gk1</sub>) (Molecular Probes).

For the Dam1 Ser257 analysis, yeast cells were lysed and prepared for SDS/PAGE by sequential treatment with alkali and trichloroacetic acid, as previously described (8). The Ser257-P antibody was used at a concentration of 0.5  $\mu$ g/mL after pretreatment for 30 min with 5.0  $\mu$ g/mL of nonphosphorylated peptide, and anti-Dam1 antibody was used at 1:5,000 final concentration (9). The phospho-specific signal was quantified as previously described (9).

For histone H3 Ser10 analysis, overnight cultures grown in YPD at 24 °C were diluted to  $\sim 1 \times 10^7$  cells/mL and grown for 2 h at 24 °C. Cultures were then split and grown for 2 h more, one-half of each culture at 24 °C and the other half at 30 °C. Cultures were placed on ice, and 1.6-mL samples were pelleted and resuspended in 1 $\times$  sample buffer with phosphatase inhibitors. Glass beads were added to 1/2 sample volume, and cells were lysed 5 min at 4 °C. After 5 min at 99 °C, samples were centrifuged briefly, and 30  $\mu$ l of supernatant was applied to precast 4–20% gradient gels (Bio-Rad). Gels were blotted to PVDF membrane as recommended by the manufacturer, and blots were blocked with 5% milk in tris buffered saline with 0.1% tween-20 and probed with anti-phospho-histone H3 (serine 10) (Millipore) and HRP-conjugated goat anti-rabbit IgG (Bio-Rad). ECL reagents (Pierce) were used to develop the blots, and signal was detected and quantitated using the Chemidoc system. Blots were then stripped using Western ReProbe (G-Biosciences) at 1 $\times$  for 4–5 h, reblocked, and reprobed using antihistone H3 (Millipore) to obtain total histone H3 signal.

**Microscopy.** For live-cell imaging, cells were placed onto a pad of 2% agarose in SC medium and imaged through an Olympus UPlanFI 100 $\times$ /1.3 NA objective using a CoolSNAP HQ charge-coupled device camera. For imaging mCitrine and GFP, a 41001 filter set was used (Chroma Technology). For imaging mCherry, a TRITC filter set (Olympus) was used. Slidebook, version 4 software (Intelligent Imaging Innovations), was used to control camera acquisition and the z axis stepping motor (Ludl Electronic Products). For the image analysis of Glc7-mCitrine fluorescence in Fig. 5 A and B, wild-type cells expressing Glc7-mCitrine were mixed with *tcO89-17*, *YPII-GFP*, or *tcO89-71* *YPII-GFP* mutant cells expressing Glc7-mCitrine and Pom34-mCherry and imaged together in the same field. The mCherry fluorescence signal was used to distinguish the wild type from mutant cells. Fluorescence images (binned 2  $\times$  2) were acquired in a series of z-axis planes (0.5  $\mu$ m apart). Images in five planes were converted into a z-axis projection, and the average fluorescence in nine adjacent pixels was measured in the nucleus and cytoplasm of each cell using ImageJ 1.43. software (10). Care was taken to avoid the high fluorescent signal that corresponds to the nucleolus and low fluorescence in the cytoplasm associated with the vacuole. For the quantitation of fluorescence in Fig. 4D, wild-type cells expressing Glc7-mCitrine and Pom34-mCherry (KT3242) were grown to log phase in YPD medium and then

incubated in YPD medium containing 10 mM caffeine or 10 mM rapamycin. After a 2-h incubation at 30 °C, cells were collected by centrifugation, washed in YPD, and mixed with congenic un-

treated cells (KT3249) that lacked the Pom34-mCherry fusion protein. The mixture of treated and untreated cells were imaged in the same field as described above.

1. Cannon JF, Tatchell K (1987) Characterization of *Saccharomyces cerevisiae* genes encoding subunits of cyclic AMP-dependent protein kinase. *Mol Cell Biol* 7: 2653–2663.
2. Sherman F, Fink GR, Hicks JB (1986) *Methods in Yeast Genetics* (Cold Spring Harbor Laboratory Press, Cold Spring Harbor, NY).
3. Sambrook J, Fritsch EF, Maniatis T (1989) *Molecular Cloning: A Laboratory Manual* (Cold Spring Harbor Laboratory Press, Cold Spring Harbor, NY).
4. Gietz D, St Jean A, Woods RA, Schiestl RH (1992) Improved method for high efficiency transformation of intact yeast cells. *Nucleic Acids Res* 20:1425.
5. Winzeler EA, et al. (1999) Functional characterization of the *S. cerevisiae* genome by gene deletion and parallel analysis. *Science* 285:901–906.
6. Davis NG, Horecka JL, Sprague GF, Jr. (1993) Cis- and trans-acting functions required for endocytosis of the yeast pheromone receptors. *J Cell Biol* 122:53–65.
7. Stuart JS, Frederick DL, Varner CM, Tatchell K (1994) The mutant type 1 protein phosphatase encoded by *glc7-1* from *Saccharomyces cerevisiae* fails to interact productively with the *GAC1*-encoded regulatory subunit. *Mol Cell Biol* 14:896–905.
8. Mekhail K, Seebacher J, Gygi SP, Moazed D (2008) Role for perinuclear chromosome tethering in maintenance of genome stability. *Nature* 456:667–670.
9. Keating P, Rachidi N, Tanaka TU, Stark MJ (2009) Ipl1-dependent phosphorylation of Dam1 is reduced by tension applied on kinetochores. *J Cell Sci* 122:4375–4382.
10. Abramoff MD, Magelhaes PJ, Ram SJ (2004) Imaging Processing with ImageJ. *Biophotonics International* 11:36–42.

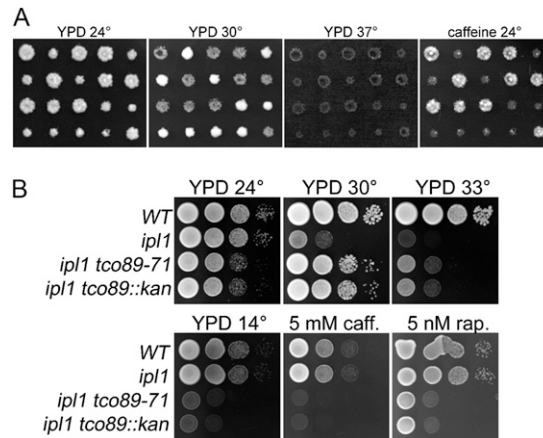

**Fig. S1.** (A) Cosegregation of *ipl1-2* suppression and caffeine sensitivity in a *tc089-71* mutant. A diploid strain homozygous for *ipl1-2* and heterozygous *tc089-71* (KT1829 × KT3002) was subjected to tetrad analysis. The four spores from each tetrad were separated into vertical rows on YPD medium and allowed to grow at 24 °C for 3 d. The spore clones were then replicate-plated to YPD medium at 24 °C, 30 °C, and 37 °C and to YPD containing 2.5 mM caffeine at 24 °C and imaged after 48 h. Note the cosegregation of *ipl1* suppression and caffeine sensitivity. (B) *tc089-71* and *tc089::kanMX* mutants have identical phenotypes. Cultures of WT (KT1112), *ipl1-2* (KT1963), *ipl1-2 tco89-71* (KT3002), and *ipl1-2 tco89::kanMX* (KT3098) strains were serially diluted onto YPD medium and YPD containing 5 mM caffeine or 5 nM rapamycin and incubated at the designated temperature before imaging. The caffeine and rapamycin panels were incubated at 24 °C. Plates were incubated for 40 h, with the exception of the 14 °C panel, which was incubated for 13 d.

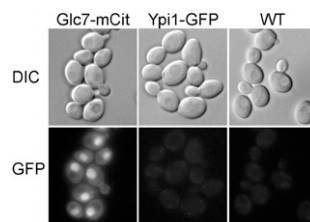

**Fig. S2.** Ypi1-GFP fluorescence is at or below the limit of detection. *GLC7-mCit* (KT3242), *YPI1-GFP* (KT3248), and WT (KT3251) cells were grown to midlog phase in YPD medium at 30 °C and imaged using the GFP filter cube that was used for the image analysis presented in Fig. 4. The same normalization values were used for each fluorescence image.

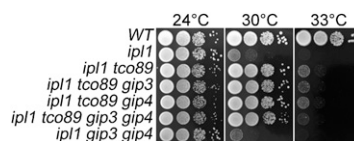

**Fig. S3.** *gip3Δ* and *gip4Δ* mutations do not influence the temperature sensitivity of *ipl1-2 tco89-71* mutants. Cultures of WT (KT1113), *ipl1-2* (KT1829), *ipl1-2 tco89-71* (KT3003), *ipl1-2 tco89-71 gip3Δ::kanMX* (KT3090), *ipl1-2 tco89-71 gip4Δ::kanMX* (KT3094), *ipl1-2 tco89-71 gip3Δ::kanMX gip4Δ::kanMX* (KT3119), and *ipl1-2 gip3Δ::kanMX gip4Δ::kanMX* (KT3117) strains were serially diluted onto YPD medium and incubated at the designated temperatures for 48 h before imaging.

**Table S1. Genetic linkage of *tco89-71* with *IPL1* and *PPQ1***

| Cross  | Markers                    | P:NP:T  | Map distance (cM) |
|--------|----------------------------|---------|-------------------|
| EG1885 | <i>ipl1-2-tco89-71</i>     | 32:0:15 | 16                |
| EG1891 | <i>ipl1-2-tco89-71</i>     | 28:0:16 | 18.2              |
| EG1891 | <i>ppq1::URA3-tco89-71</i> | 44:0:0  | <1.1              |

P:NP:T, parental ditype: nonparental ditype: tetratype.

**Table S2. Strain list**

| Name   | Description                                                                                                 | Source     |
|--------|-------------------------------------------------------------------------------------------------------------|------------|
| KT1112 | <i>MAT<math>\alpha</math> leu2 his3 ura3-52</i>                                                             | (1)        |
| KT1113 | <i>MAT<math>\alpha</math> leu2 his3 ura3-52</i>                                                             | (2)        |
| KT1774 | <i>MAT<math>\alpha</math> glc7-129</i>                                                                      | (3)        |
| KT1829 | <i>MAT<math>\alpha</math> ipl1-2</i>                                                                        | (3)        |
| KT1963 | <i>MAT<math>\alpha</math> ipl1-2</i>                                                                        | (4)        |
| KT1964 | <i>MAT<math>\alpha</math> glc7-109 ipl1-2</i>                                                               | (3)        |
| KT1965 | <i>MAT<math>\alpha</math> glc7-127 ipl1-2</i>                                                               | (3)        |
| KT1966 | <i>MAT<math>\alpha</math> glc7-109</i>                                                                      | (3)        |
| KT1967 | <i>MAT<math>\alpha</math> glc7-127</i>                                                                      | (3)        |
| KT1968 | <i>MAT<math>\alpha</math> glc7-127 ipl1-2</i>                                                               | (3)        |
| KT1969 | <i>MAT<math>\alpha</math> glc7-127</i>                                                                      | (3)        |
| KT2088 | <i>MAT<math>\alpha</math> his3::GFP-lacI::HIS3 trp1::lacO<sub>256</sub>::TRP1</i>                           | This study |
| KT2941 | <i>MAT<math>\alpha</math> tco89-71 ipl1-2</i>                                                               | This study |
| KT2958 | <i>MAT<math>\alpha</math> tco89-71</i>                                                                      | This study |
| KT2959 | <i>MAT<math>\alpha</math> tco89-71</i>                                                                      | This study |
| KT2998 | <i>MAT<math>\alpha</math> YPI1-GFP::kanMX6 tco89-71</i>                                                     | This study |
| KT3000 | <i>MAT<math>\alpha</math> YPI1-GFP::kanMX6 tco89-71 ipl1-2</i>                                              | This study |
| KT3002 | <i>MAT<math>\alpha</math> tco89-71 ipl1-2</i>                                                               | This study |
| KT3003 | <i>MAT<math>\alpha</math> tco89-71 ipl1-2</i>                                                               | This study |
| KT3004 | <i>MAT<math>\alpha</math> tco89-71 glc8::URA3 ipl1-2</i>                                                    | This study |
| KT3005 | <i>MAT<math>\alpha</math> glc8::URA3 ipl1-2</i>                                                             | This study |
| KT3007 | <i>MAT<math>\alpha</math> YPI1-GFP::kanMX ipl1-2</i>                                                        | This study |
| KT3010 | <i>MAT<math>\alpha</math> tor1<math>\Delta</math>::HIS3 ipl1-2</i>                                          | This study |
| KT3011 | <i>MAT<math>\alpha</math> tor1<math>\Delta</math>::HIS3 YPI1-GFP::kanMX6 ipl1-2</i>                         | This study |
| KT3030 | <i>MAT<math>\alpha</math> his3::GFP-lacI::HIS3 trp1::LacO<sub>256</sub>::TRP1 tco89-71 ipl1-2</i>           | This study |
| KT3031 | <i>MAT<math>\alpha</math> his3::GFP-lacI::HIS3 trp1::LacO<sub>256</sub>::TRP1 ipl1-2</i>                    | This study |
| KT3076 | <i>MAT<math>\alpha</math> glc7-129 ipl1-2</i>                                                               | This study |
| KT3090 | <i>MAT<math>\alpha</math> tco89-71 ipl1-2 gip3<math>\Delta</math>::kanMX</i>                                | This study |
| KT3094 | <i>MAT<math>\alpha</math> tco89-71 ipl1-2 gip4<math>\Delta</math>::kanMX</i>                                | This study |
| KT3117 | <i>MAT<math>\alpha</math> ipl1-2 gip3<math>\Delta</math>::kanMX gip4<math>\Delta</math>::kanMX</i>          | This study |
| KT3119 | <i>MAT<math>\alpha</math> tco89-71 ipl1-2 gip3<math>\Delta</math>::kanMX gip4<math>\Delta</math>::kanMX</i> | This study |
| KT3242 | <i>MAT<math>\alpha</math> GLC7-mCitrine::SpHis5 POM34-mCherry::SpHis5</i>                                   | This study |
| KT3245 | <i>MAT<math>\alpha</math> GLC7-mCitrine::SpHis5 POM34-mCherry::SpHis5 tco90-71</i>                          | This study |
| KT3247 | <i>MAT<math>\alpha</math> GLC7-mCitrine::SpHis5 POM34-mCherry::SpHis5 YPI1-GFP::kanMX</i>                   | This study |
| KT3248 | <i>MAT<math>\alpha</math> POM34-mCherry::SpHis5 YPI1-GFP::kanMX</i>                                         | This study |
| KT3250 | <i>MAT<math>\alpha</math> GLC7-mCitrine::SpHis5 POM34-mCherry::SpHis5 YPI1-GFP::kanMX tco89-71</i>          | This study |
| KT3251 | <i>MAT<math>\alpha</math> POM34-mCherry::SpHis5</i>                                                         | This study |
| KT3252 | <i>MAT<math>\alpha</math> GLC7-mCitrine::SpHis5</i>                                                         | This study |

All strains are congenic to KT1113 and KT1112 and have the *leu2 his3 ura3-52* mutations.

1. Stuart JS, Frederick DL, Varner CM, Tatchell K (1994) The mutant type 1 protein phosphatase encoded by *glc7-1* from *Saccharomyces cerevisiae* fails to interact productively with the *GAC1*-encoded regulatory subunit. *Mol Cell Biol* 14:896–905.
2. Frederick DL, Tatchell K (1996) The *REG2* gene of *Saccharomyces cerevisiae* encodes a type 1 protein phosphatase-binding protein that functions with Reg1p and the Snf1 protein kinase to regulate growth. *Mol Cell Biol* 16:2922–2931.
3. Hsu J-Y, et al. (2000) Mitotic phosphorylation of histone H3 is governed by Ipl1/aurora kinase and Glc7/PP1 phosphatase in budding yeast and nematodes. *Cell* 102:279–291.
4. Bharucha JP, Larson JR, Gao L, Daves LK, Tatchell K (2008) Ypi1, a positive regulator of nuclear protein phosphatase type 1 activity in *Saccharomyces cerevisiae*. *Mol Biol Cell* 19: 1032–1045.
